# Supplementary material
Source: Springer Nature journal article supplement (https://www.springermedizin.de/resource/supplementary/12936_2007_362_MOESM1_ESM.pdf/9547638)
Supplement: MOESM1 [file 9547638]

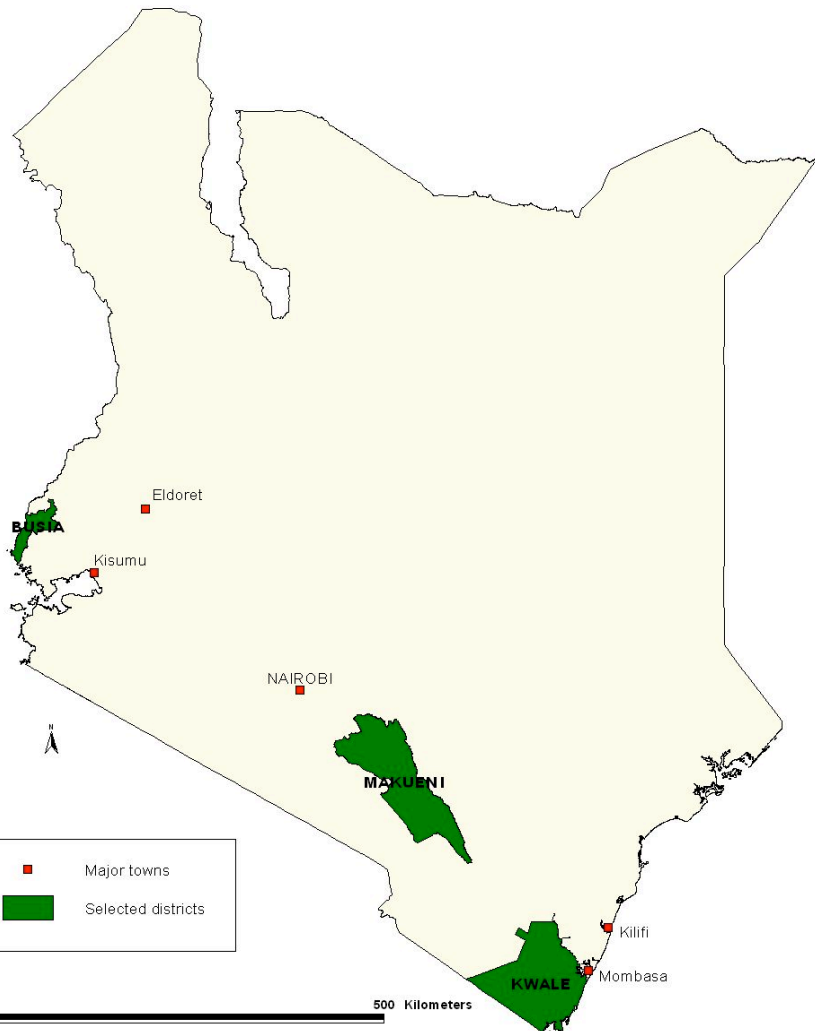

Eldoret

Kisumu

NAIROBI

MAKUENI

KWALE

Kilifi

Mombasa

BURUNDI

- Major towns
- Selected districts

0 500 Kilometers
